# Supplementary material
Source: PubMed Central journal article supplement (PMC3490612)
Supplement: supp_pp.112.202762_202762Figure_S1.pdf [file supp_pp.112.202762_202762Figure_S1.pdf]

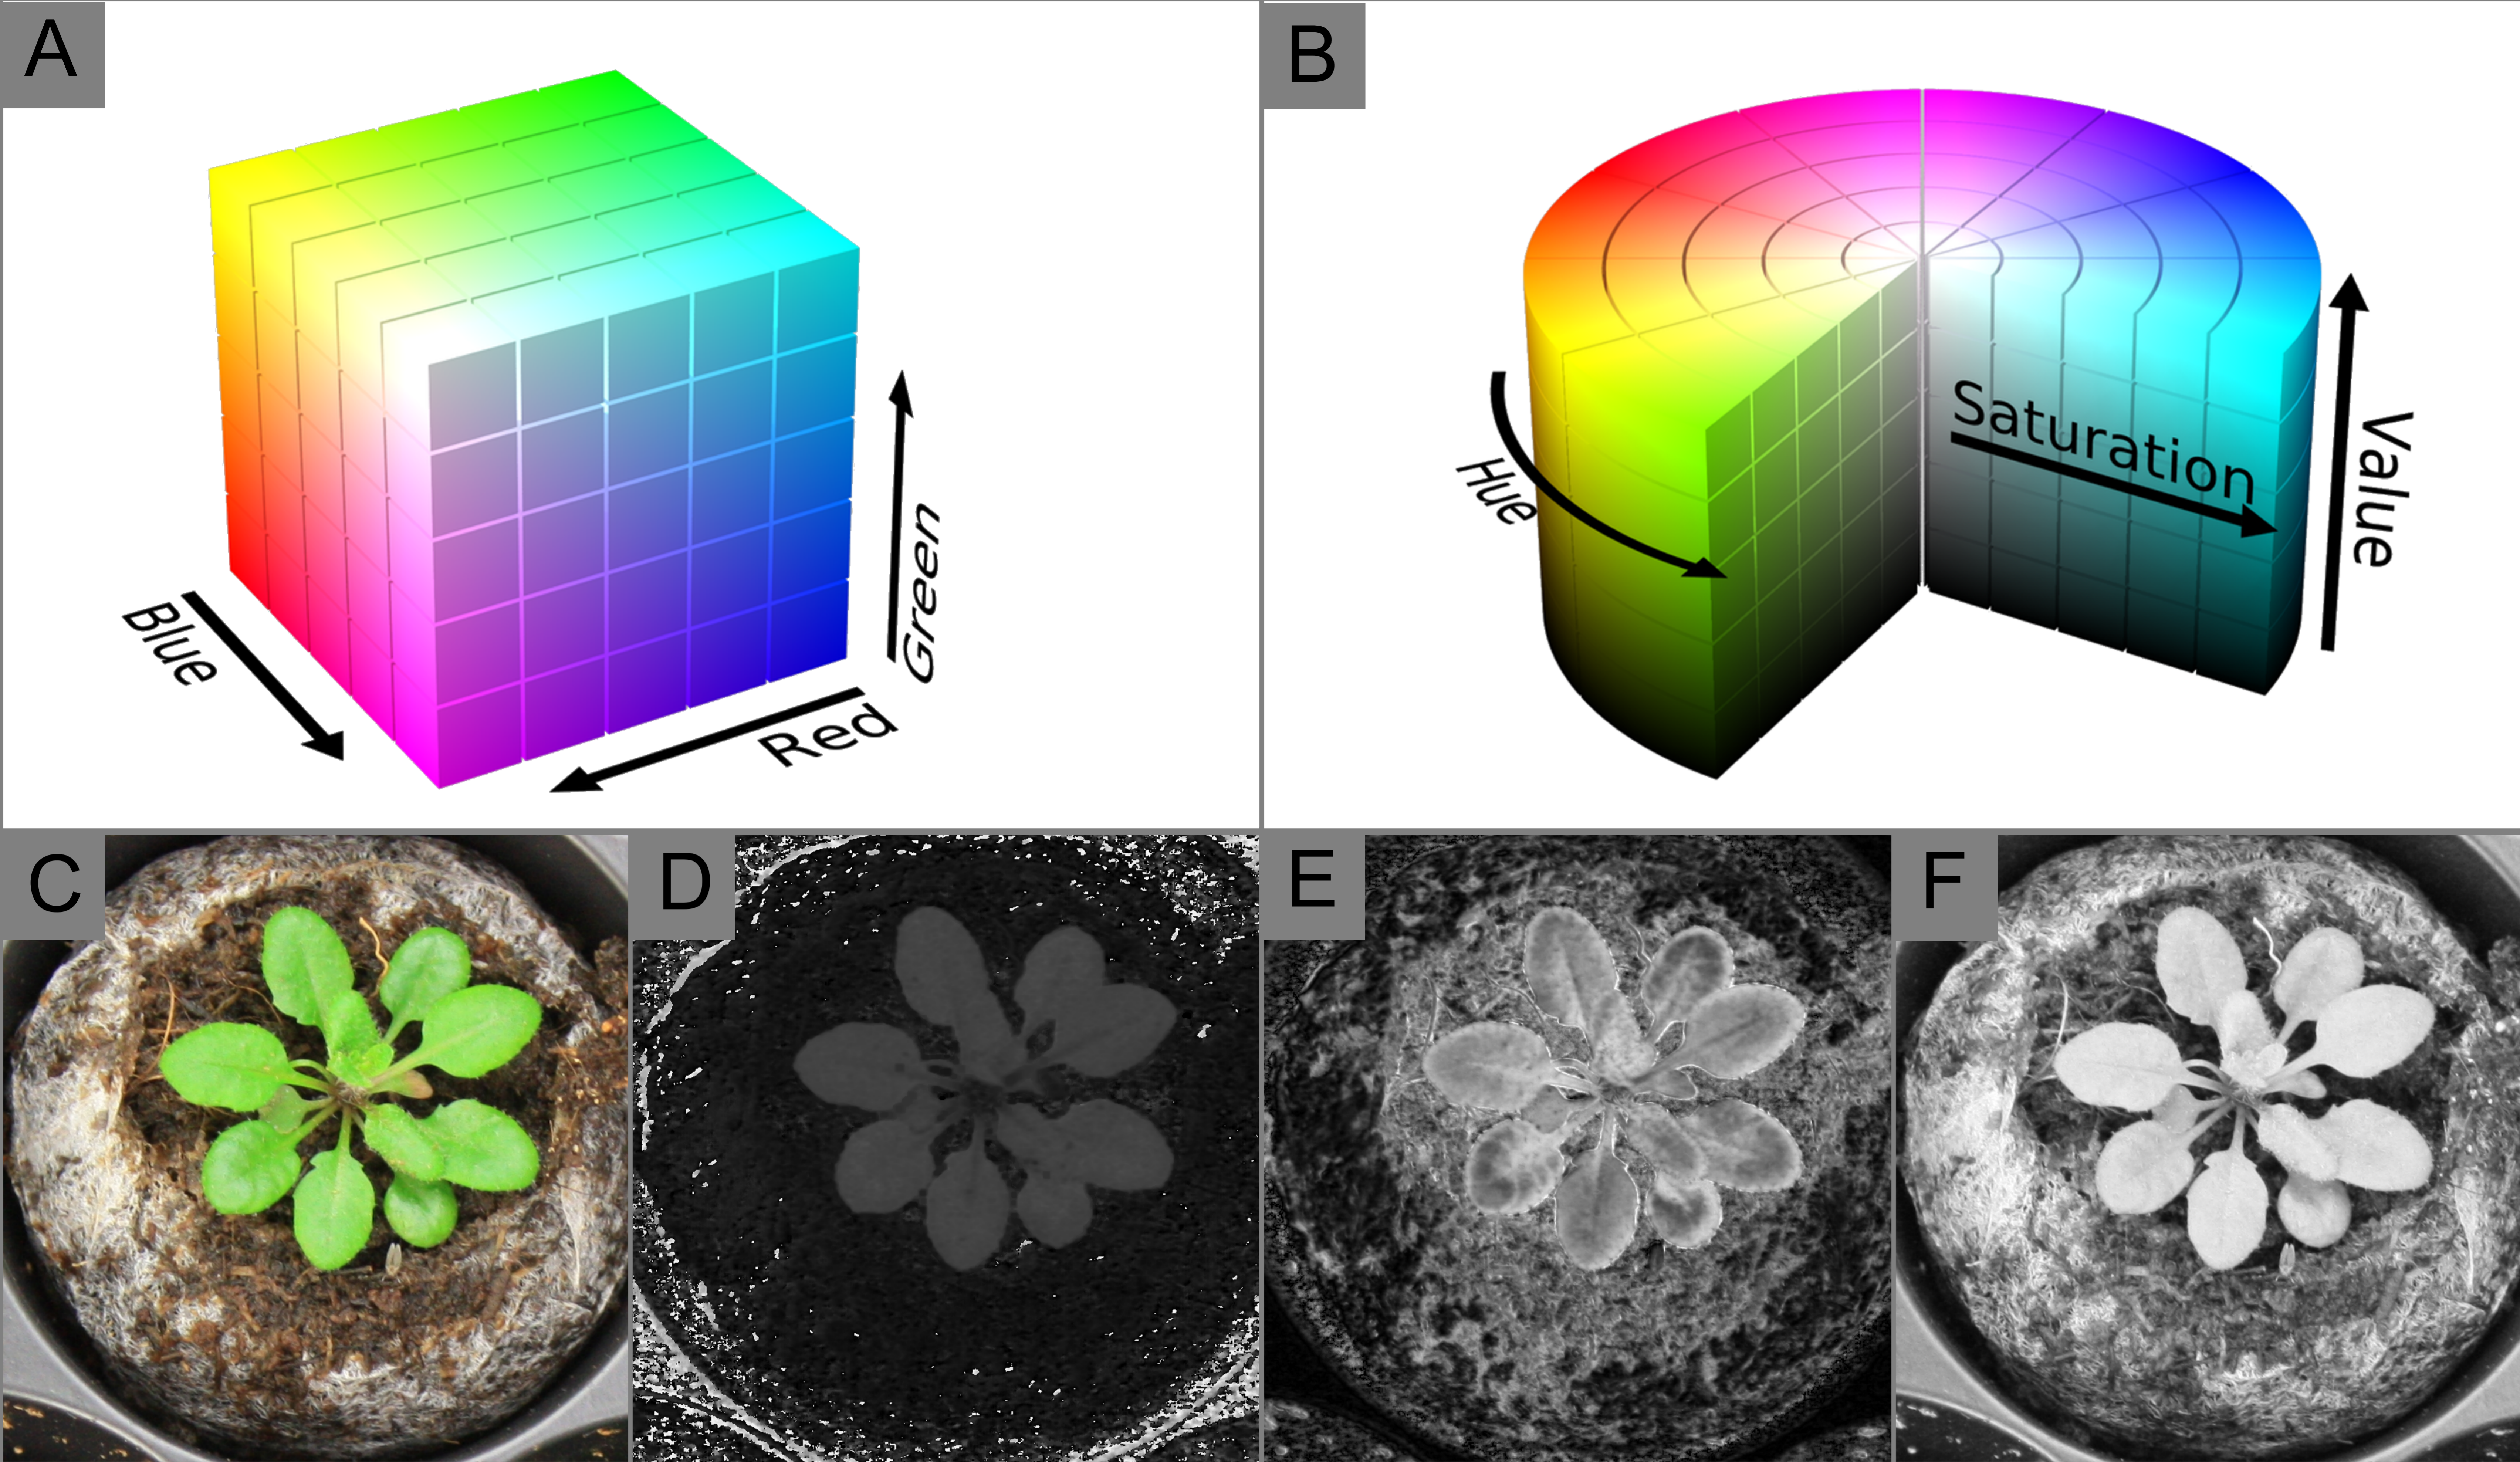

Figure S1. The top row depicts two possible representation of colour: A) the RGB colour cube, B) the HSV cylinder. The bottom row shows an example of the representation of a VIS image in HSV colour space: C) a typical VIS image of Arabidopsis rosettes. D) the hue channel, E) the saturation channel and F) the value channel of the VIS image
