# Supplementary material
Source: PubMed Central journal article supplement (PMC3490612)
Supplement: supp_pp.112.202762_202762figure_S2.pdf [file supp_pp.112.202762_202762figure_S2.pdf]

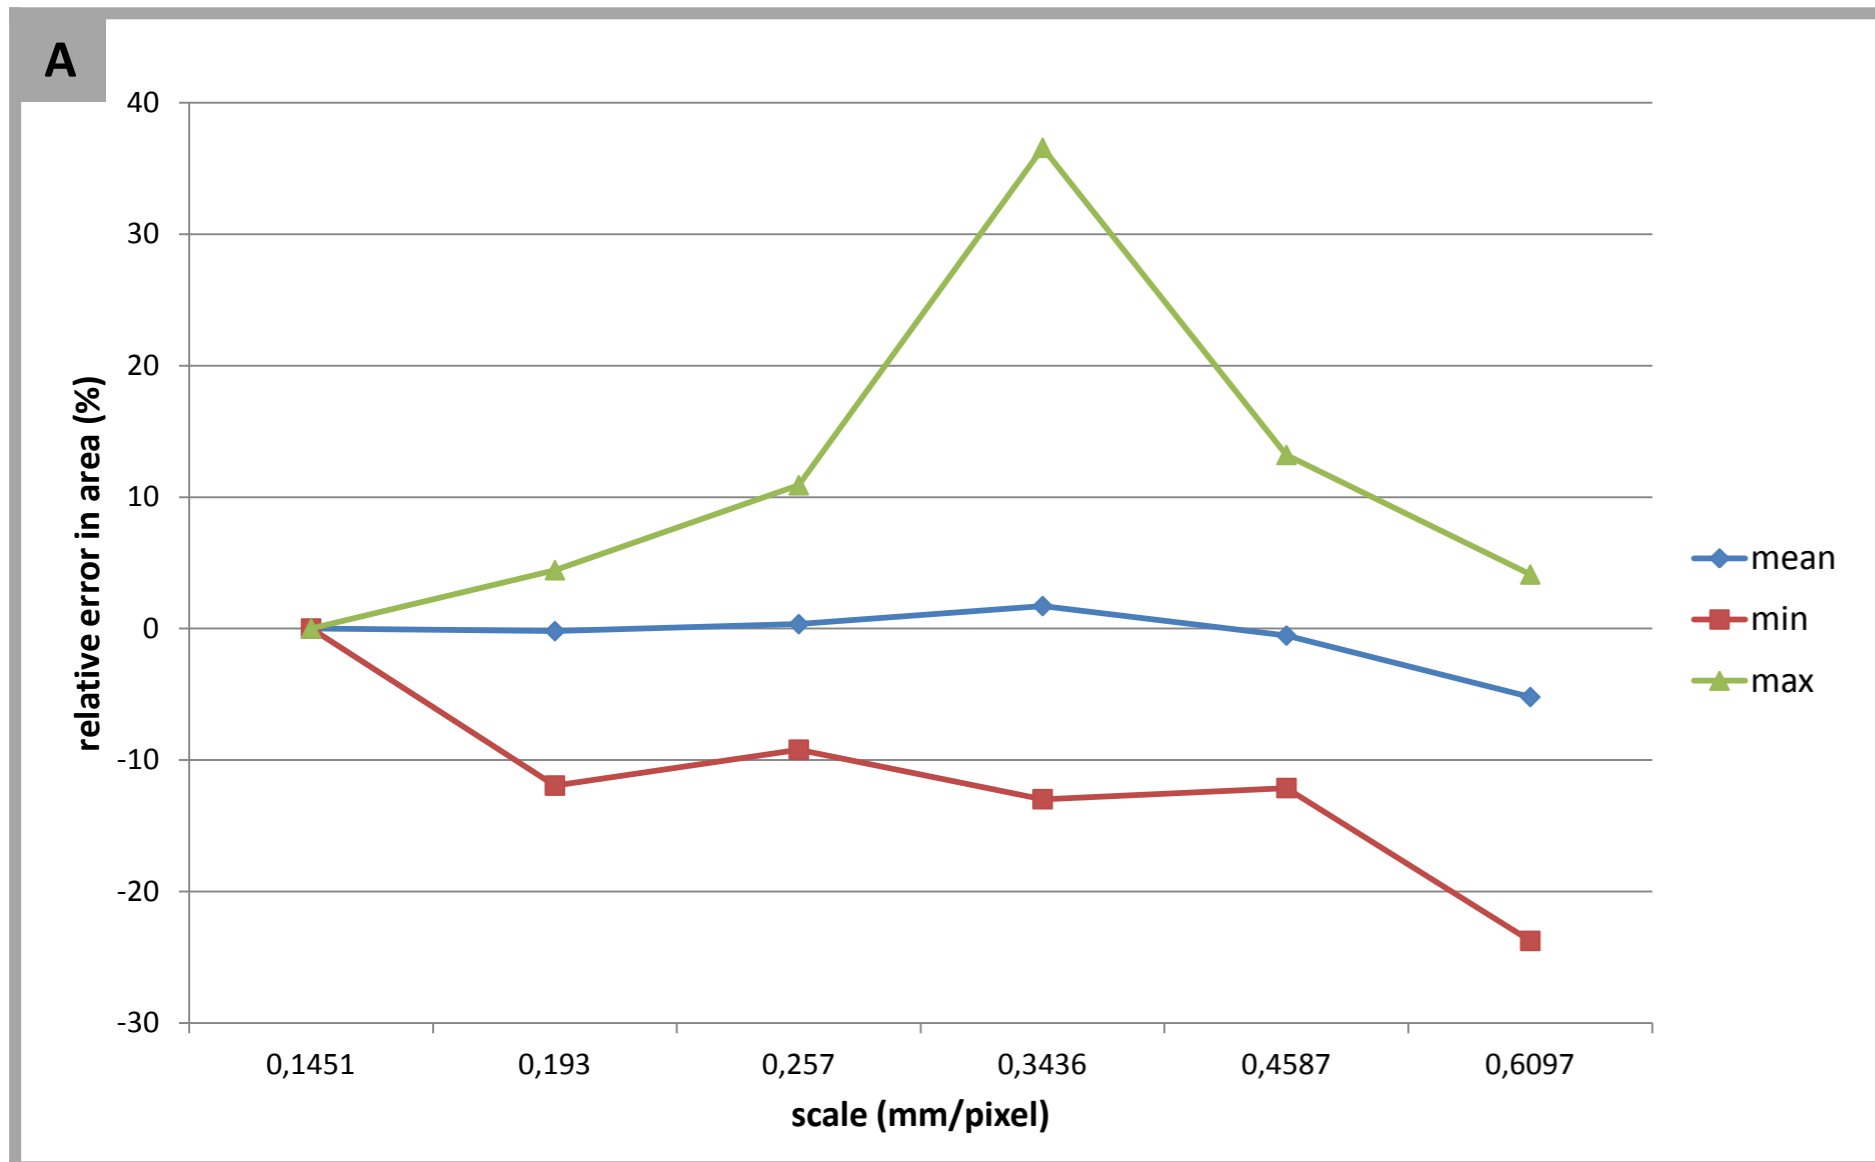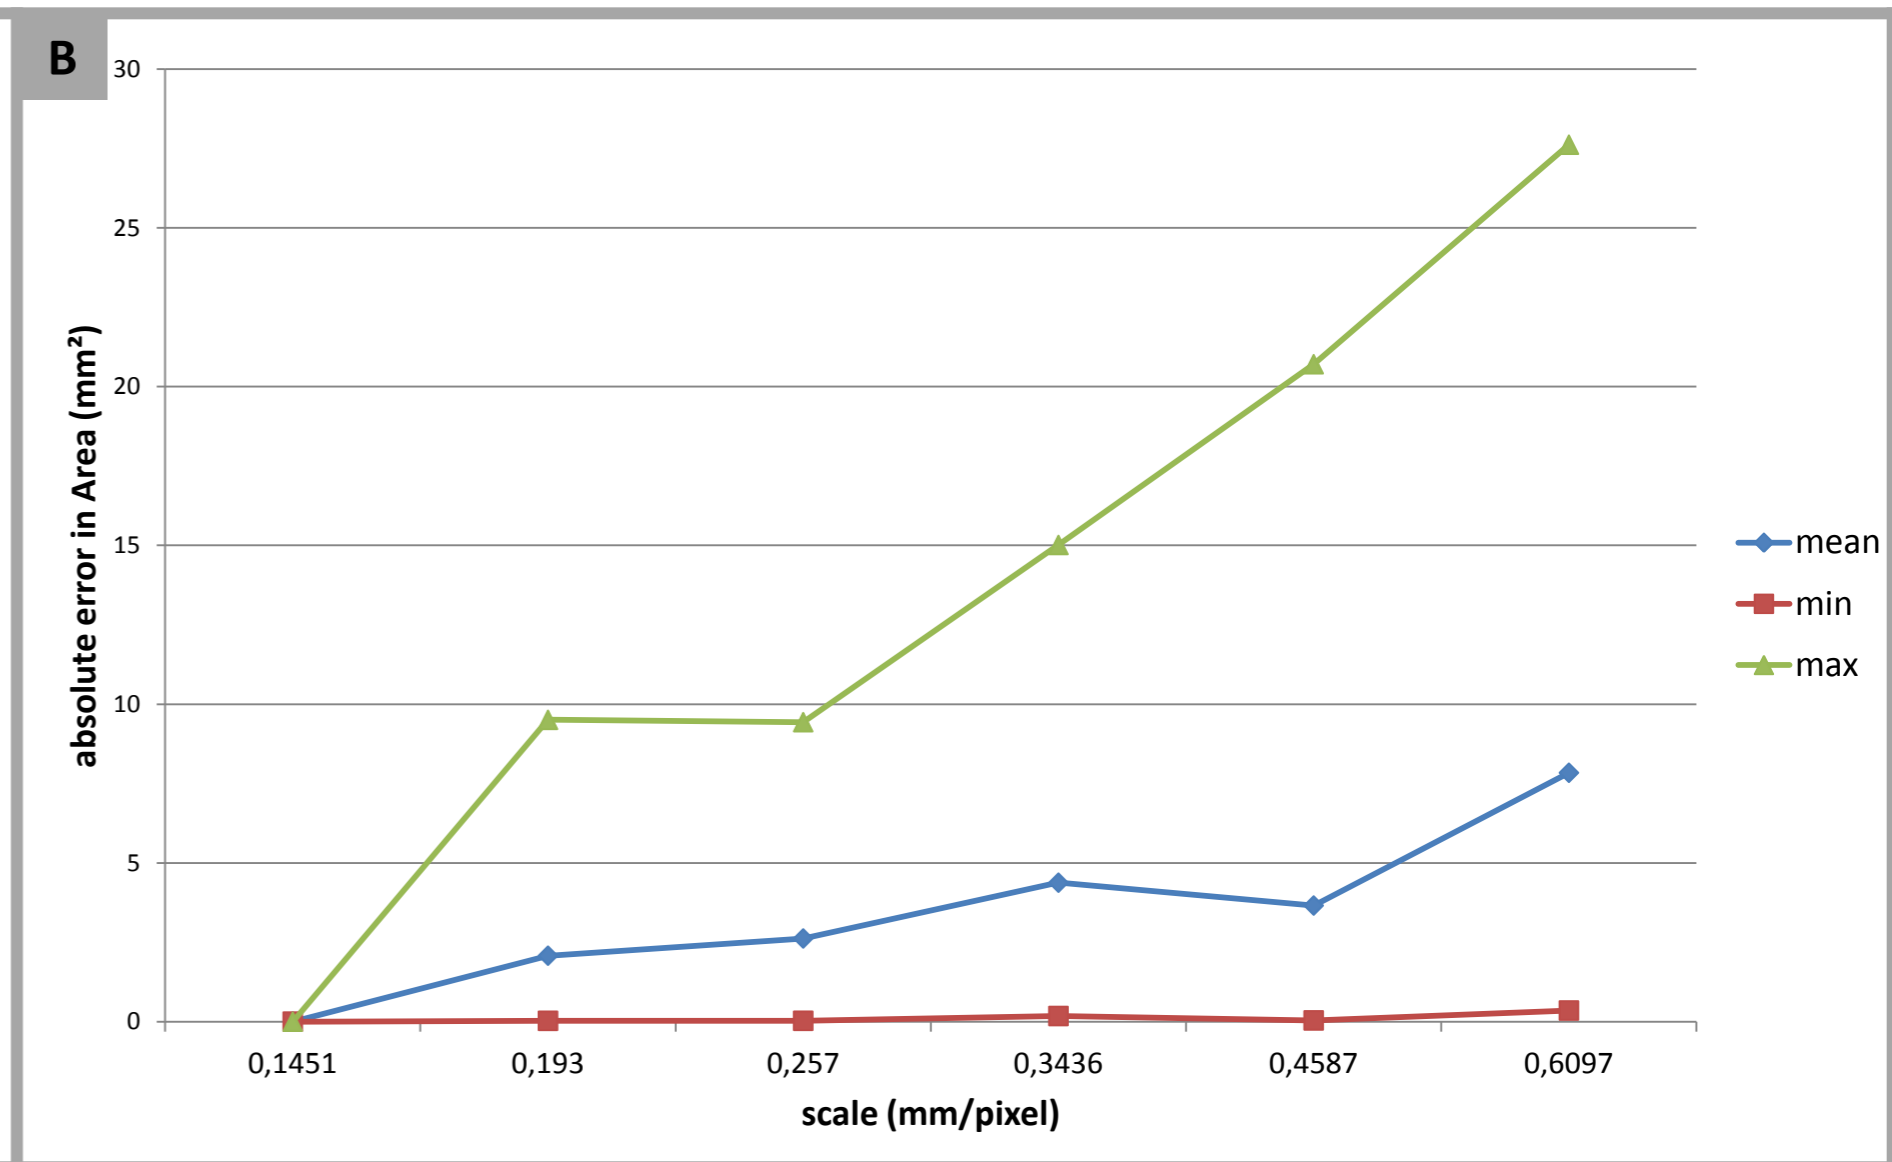

Figure S2. The relation between scale and error on area measurements. A VIS image showing 51 rosettes was rescaled to different resolutions using irfanview. On the left the relative error on the measurements based on the high resolution and the rescaled images is shown. The absolute error is shown on the right. The peak in relative error at scale 0.3436 is due to a an error on a small rosette, i.e. A small error of 4.7 mm<sup>2</sup> on a plant with total area of only 13mm<sup>2</sup>.
