# Supplementary material
Source: PubMed Central journal article supplement (PMC3490612)
Supplement: supp_pp.112.202762_202762Figure_S3_August2012.pdf [file supp_pp.112.202762_202762Figure_S3_August2012.pdf]

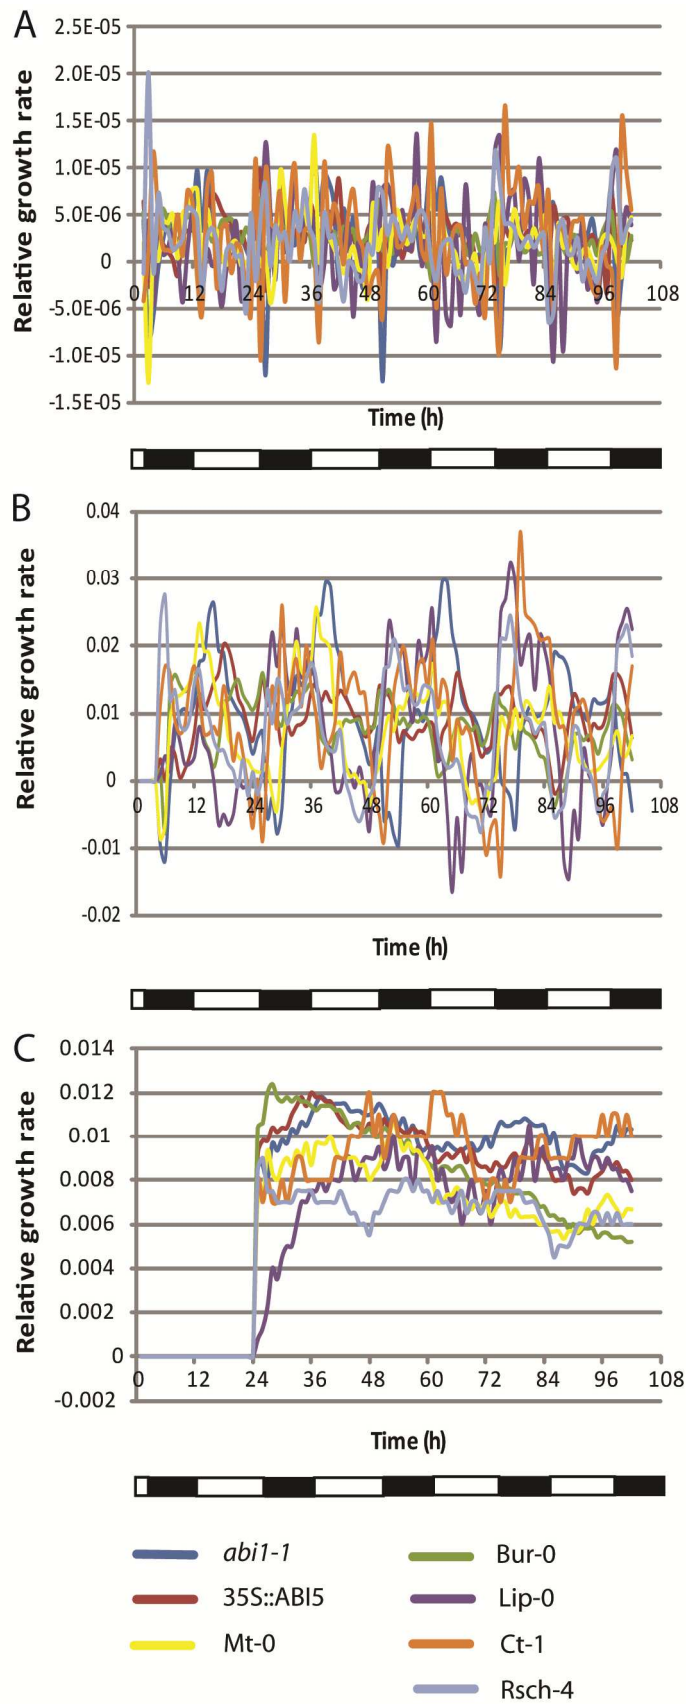

Figure S3. Data as in Figure 4E. Comparison of Relative Growth Rate results using different time intervals. A) time interval 1h, B) time interval 4h, C) time interval 24h.
